## Estrogen-receptor- $\alpha$ exchange and chromatin dynamics are ligand- and domain-dependent

Z. Dave Sharp, Maureen G. Mancini, Cruz A. Hinojos, Fangyan Dai, Valeria Berno, Adam T. Szafran, Kelly P. Smith, Tanmay P. Lele, Donald E. Ingber and Michael A. Mancini

*Journal of Cell Science* 119, 4365 (2006) doi:10.1242/jcs.03264

There was an error published in *J. Cell Sci.* **119**, 4101-4116.

In the print and online versions of this paper, the middle initial for Tanmay P. Lele was incorrect. The correct author list is shown above.
